# Supplementary material for: Antimicrobial laser-activated sealants for combating surgical site infections
Source: Royal Society of Chemistry journal article supplement (doi:10.1039/d0bm01438a), 2021-01-01
Supplement: d0bm01438a1.pdf [file d0bm01438a1.pdf]

## SUPPORTING INFORMATION

# Antimicrobial Laser-Activated Sealants for Combating Surgical Site Infections

Russell Urie<sup>a</sup>, Michelle McBride<sup>b</sup>, Deepanjan Ghosh<sup>c</sup>, Ali Fattahi<sup>a</sup>, Rajeshwar Nitiyanandan<sup>c</sup>, John Popovich<sup>b</sup>, Jeffrey J. Heys<sup>d</sup>, Jacquelyn Kilbourne<sup>e</sup>, Shelley E. Haydel<sup>b,f\*</sup>, and Kaushal Rege<sup>a,c\*</sup>

<sup>a</sup> Chemical Engineering Program, School for Engineering of Matter, Transport, and Energy

<sup>b</sup> Biodesign Institute Center for Bioelectronics and Biosensors

<sup>c</sup> Biological Design Graduate Program

<sup>e</sup> Department of Animal Care and Technologies

<sup>f</sup> School of Life Sciences

Arizona State University, Tempe, AZ 85287, USA

<sup>d</sup> Chemical and Biological Engineering Department,  
Montana State University, Bozeman, MT 59717, USA

(\*) To whom correspondence must be addressed:

Prof. Kaushal Rege  
Chemical Engineering  
501 E. Tyler Mall, ECG 303  
Arizona State University  
Tempe, AZ 85287-6106 USA  
Email: [rege@asu.edu](mailto:rege@asu.edu)  
Phone: (480) 727-8616  
Fax: 480-727-9321

Prof. Shelley E. Haydel  
Biodesign Institute Center for Bioelectronics and Biosensors  
1001 S. McAllister Ave.  
Arizona State University  
Tempe, AZ 85287  
Email: [shelley.haydel@asu.edu](mailto:shelley.haydel@asu.edu)  
Phone: (480) 727-7234

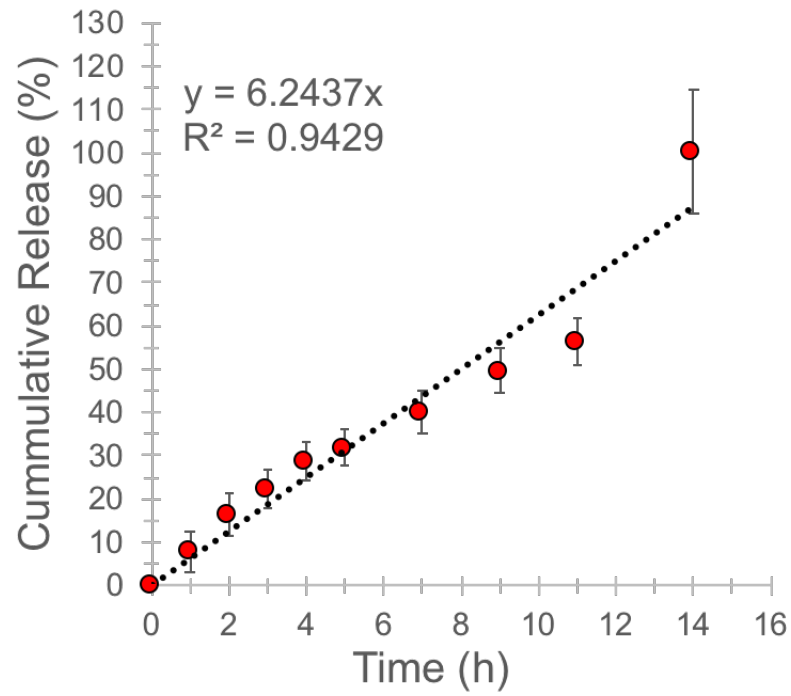

**Figure S1.** Vancomycin release from silk films for the first 14 h as fit to a zero-order kinetics model (trendline). Data points indicate mean  $\pm$  one standard deviation.

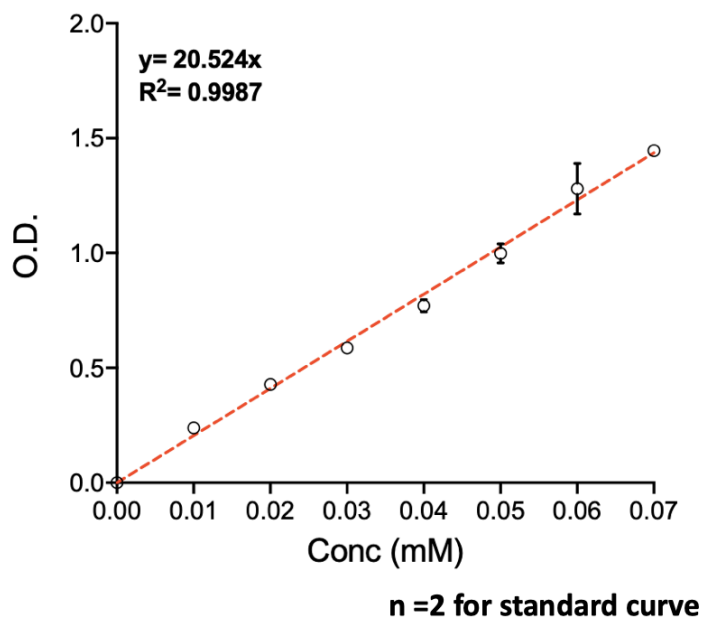

**Figure S2.** A calibration curve for absorbance with concentration for ICG in PBS (0.00 - 0.07 mM).

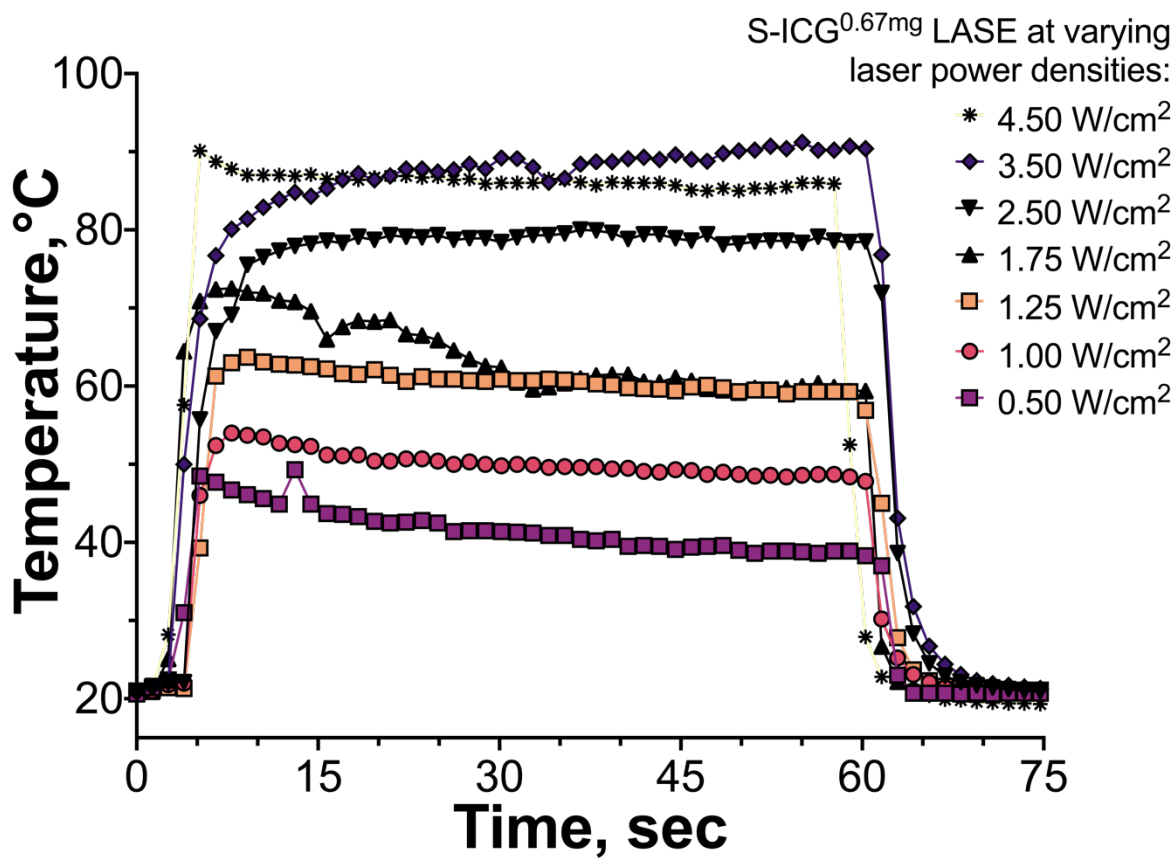

**Figure S3.** Photothermal response of silk-indocyanine green (S-ICG<sup>0.67mg</sup>) LASE. Dry films were irradiated with NIR (800-nm) laser for approximately 60 sec. Laser exposure commenced at time 0 sec and terminated at time 60 sec. Representative profiles from n=3 independent experiments are shown.

Mouse 1

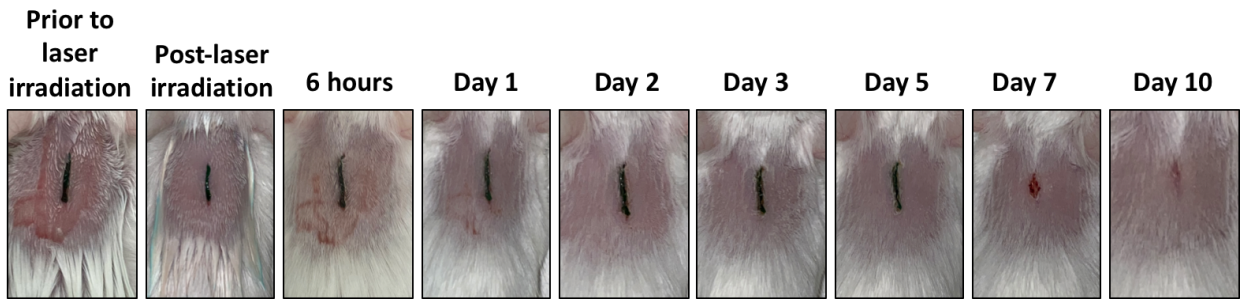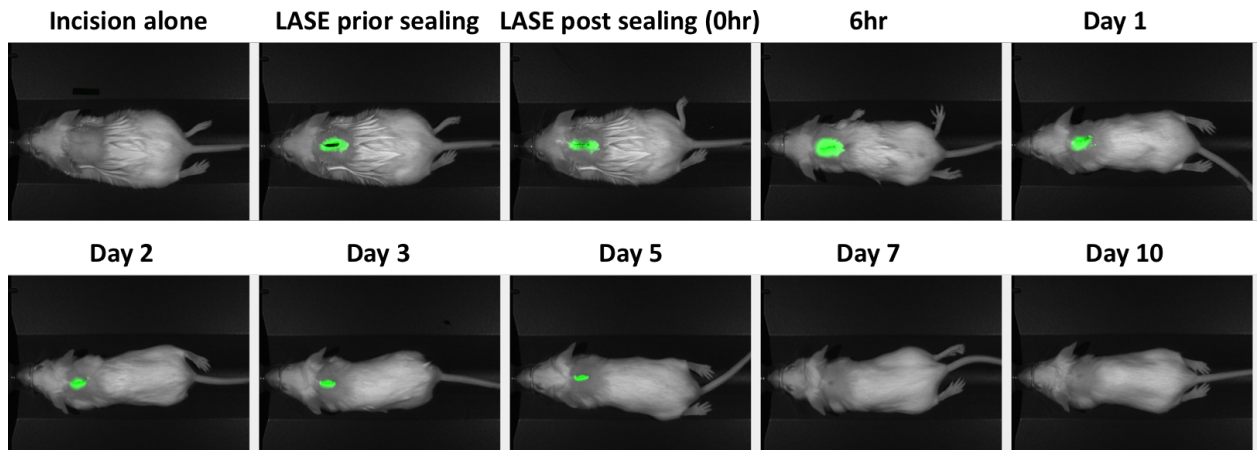

Mouse 2

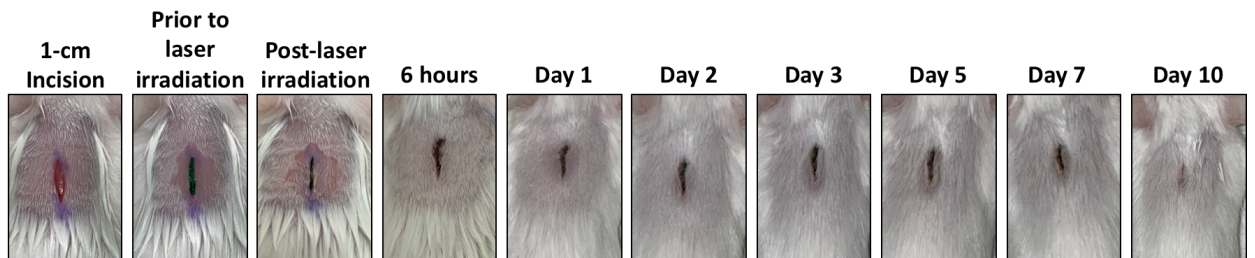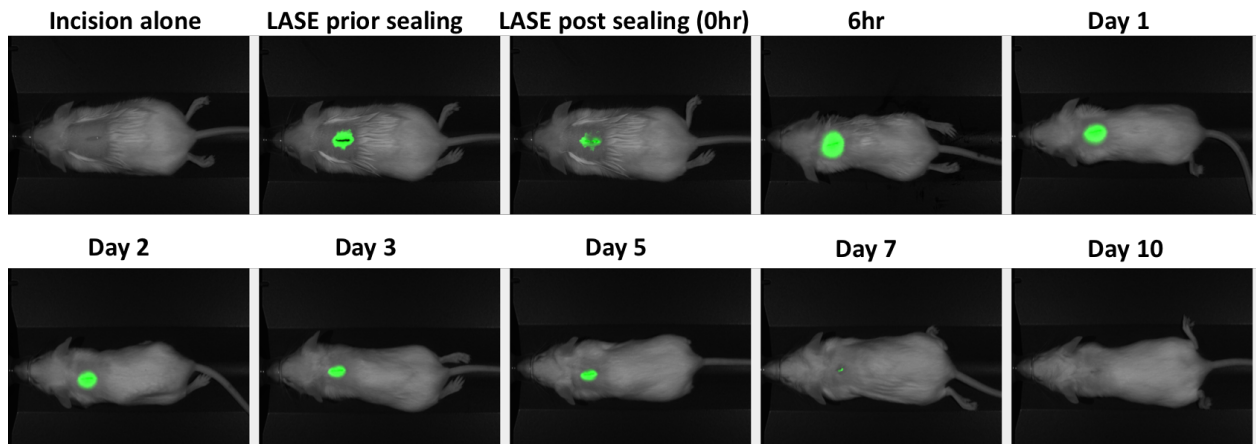

**Figure S4.** White light and fluorescence imaging of S-ICG LASEs in BALB/c mice before and after laser sealing. These images are additional n=2 for the images shown in Figure 4 in the main manuscript.

|            | RFU @ 800nm channel |         |         |
|------------|---------------------|---------|---------|
| Timepoints | Mouse 1             | Mouse 2 | Mouse 3 |
| 0 hour     | 18700               | 4650    | 6560    |
| 6 hours    | 38900               | 26900   | 15100   |
| Day 1      | 19800               | 17500   | 11700   |
| Day 2      | 12400               | 8790    | 9560    |
| Day 3      | 11000               | 10800   | 7420    |
| Day 5      | 9560                | 9830    | 7790    |
| Day 7      | 601                 | 9130    | 957     |
| Day 10     | 554                 | 726     | 833     |

**Table S1.** Fluorescence intensity of ICG in three mice used for investigating the persistence of S-ICG LASEs over a period of 10 days.

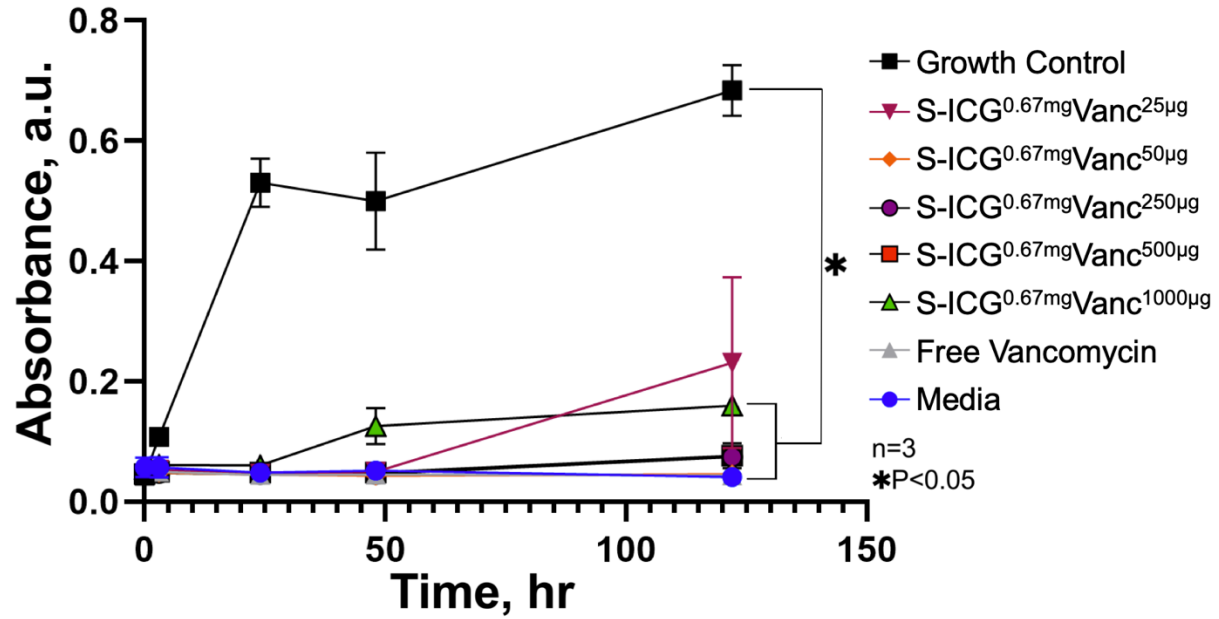

**Figure S5. Efficacy of vancomycin-loaded S-ICG<sup>0.67mg</sup> LASE films against MRSA *in vitro*.** MRSA growth in the presence of free vancomycin at 2 µg/mL or S-ICG<sup>0.67mg</sup> LASE films loaded with various vancomycin concentrations. The data represent n=3 independent experiments, and \* indicates p values < 0.05 between groups as determined by unpaired t test. With 50 µg being the lowest vancomycin that significantly reduced MRSA growth, 50 µg was defined as the minimum inhibitory concentration when loaded within S-ICG<sup>0.67mg</sup> LASE films.
